# Supplementary material for: Pse-in-One: a web server for generating various modes of pseudo components of DNA, RNA, and protein sequences
Source: PubMed Central journal article supplement (PMC4489303; doi:10.1093/nar/gkv458), 2015-05-09
Supplement: supp_gkv458_nar-00118-web-b-2015-File002.pdf [file supp_gkv458_nar-00118-web-b-2015-File002.pdf]

---

**Pse-in-One:** a web server for generating various modes of pseudo components of DNA, RNA, and protein sequences

2015-04-08

Home-page: <http://bioinformatics.hitsz.edu.cn/Pse-in-One/>

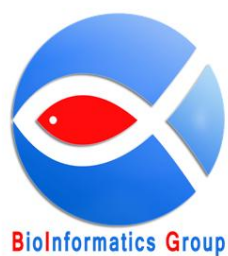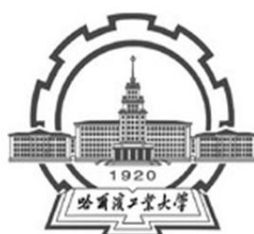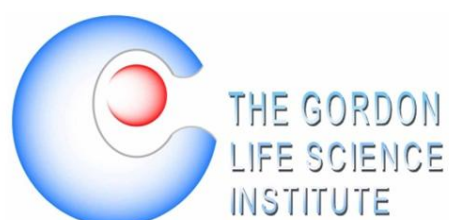

---

## Content

|                                                                                            |    |
|--------------------------------------------------------------------------------------------|----|
| 1. DNA.....                                                                                | 3  |
| 1.1 Deoxyribonucleic acid composition .....                                                | 3  |
| 1.1.1 Basic kmer (Kmer).....                                                               | 3  |
| 1.1.2 Reverse complementary kmer (RevKmer).....                                            | 3  |
| 1.2 Autocorrelation .....                                                                  | 3  |
| 1.2.1 Dinucleotide-based auto covariance (DAC).....                                        | 3  |
| 1.2.2 Dinucleotide-based cross covariance (DCC) .....                                      | 4  |
| 1.2.3 Dinucleotide-based auto-cross covariance (DACC) .....                                | 4  |
| 1.2.4 Trinucleotide-based auto covariance (TAC).....                                       | 4  |
| 1.2.5 Trinucleotide-based cross covariance (TCC) .....                                     | 5  |
| 1.2.6 Trinucleotide-based auto-cross covariance (TACC) .....                               | 5  |
| 1.3 Pseudo deoxyribonucleic acid composition.....                                          | 5  |
| 1.3.1 Pseudo dinucleotide composition (PseDNC).....                                        | 5  |
| 1.3.2 Pseudo k-tuple nucleotide composition (PseKNC).....                                  | 6  |
| 1.3.3 General parallel correlation pseudo dinucleotide composition (PC-PseDNC-General)...  | 7  |
| 1.3.4 General parallel correlation pseudo trinucleotide composition (PC-PseTNC-General)... | 8  |
| 1.3.5 General series correlation pseudo dinucleotide composition (SC-PseDNC-General).....  | 9  |
| 1.3.6 General series correlation pseudo trinucleotide composition (SC-PseTNC-General) ...  | 10 |
| 2. RNA .....                                                                               | 11 |
| 2.1 Ribonucleic acid composition.....                                                      | 11 |
| 2.1.1 Basic kmer (Kmer).....                                                               | 11 |
| 2.2 Autocorrelation .....                                                                  | 11 |
| 2.2.1 Dinucleotide-based auto covariance (DAC).....                                        | 11 |
| 2.2.2 Dinucleotide-based cross covariance (DCC) .....                                      | 12 |
| 2.2.3 Dinucleotide-based auto-cross covariance (DACC) .....                                | 12 |
| 2.3 Pseudo ribonucleic acid composition.....                                               | 12 |
| 2.3.1 General parallel correlation pseudo dinucleotide composition (PC-PseDNC-General).13  | 13 |
| 2.3.2 General series correlation pseudo dinucleotide composition (SC-PseDNC-General)....   | 13 |
| 3. Protein.....                                                                            | 14 |
| 3.1 Amino acid composition .....                                                           | 14 |
| 3.1.1 Basic kmer (Kmer).....                                                               | 15 |
| 3.2 Autocorrelation .....                                                                  | 15 |
| 3.2.1 Auto covariance (AC) .....                                                           | 15 |
| 3.2.2 Cross covariance (CC) .....                                                          | 15 |
| 3.2.3 Auto-cross covariance (ACC) .....                                                    | 16 |
| 3.3 Pseudo amino acid composition.....                                                     | 16 |
| 3.3.1 Parallel correlation pseudo amino acid composition (PC-PseAAC).....                  | 16 |
| 3.3.2 Series correlation pseudo amino acid composition (SC-PseAAC) .....                   | 17 |
| 3.3.3 General parallel correlation pseudo amino acid composition (PC-PseAAC-General)...    | 19 |
| 3.3.4 General series correlation pseudo amino acid composition (SC-PseAAC-General).....    | 20 |
| Table 1. The names of the 148 physicochemical indices for dinucleotides (DNA).....         | 22 |
| Table 2. The names of the 12 physicochemical indices for trinucleotides (DNA). ....        | 23 |
| Table 3. The names of the 6 physicochemical indices for dinucleotides (DNA).....           | 23 |
| Table 4. The names of the 22 physicochemical indices for dinucleotides (RNA).....          | 23 |
| Table 5. The names of the 547 physicochemical indices for amino acids. ....                | 24 |
| Table 6. The names of the 3 physicochemical indices for amino acids. ....                  | 27 |
| Table 7. The names of the 2 physicochemical indices for amino acids. ....                  | 28 |
| References.....                                                                            | 28 |

# 1. DNA

## 1.1 Deoxyribonucleic acid composition

### 1.1.1 Basic kmer (Kmer)

Basic kmer (1) is the simplest approach to represent the DNAs, in which the DNA sequences are represented as the occurrence frequencies of  $k$  neighboring nucleic acids. This approach has been successfully applied to human gene regulatory sequence prediction (2,3), enhancer identification (1), etc.

### 1.1.2 Reverse complementary kmer (RevKmer)

The reverse complementary kmer (2,3) is a variant of the basic kmer, in which the kmers are not expected to be strand-specific, so reverse complements are collapsed into a single feature. For example, if  $k=2$ , there are totally 16 basic kmers ('AA', 'AC', 'AG', 'AT', 'CA', 'CC', 'CG', 'CT', 'GA', 'GC', 'GG', 'GT', 'TA', 'TC', 'TG', 'TT'), but by removing the reverse complementary kmers, there are only 10 distinct kmers in the reverse complementary kmer approach ('AA', 'AC', 'AG', 'AT', 'CA', 'CC', 'CG', 'GA', 'GC', 'TA'). For more information of this approach, please refer to (2,3).

## 1.2 Autocorrelation

### 1.2.1 Dinucleotide-based auto covariance (DAC)

Suppose a DNA sequence  $\mathbf{D}$  with  $L$  nucleic acid residues; i.e.

$$\mathbf{D} = R_1 R_2 R_3 R_4 R_5 R_6 R_7 \cdots R_L \quad (1)$$

where  $R_1$  represents the nucleic acid residue at the sequence position 1,  $R_2$  the nucleic acid residue at position 2 and so forth.

The DAC (4-6) measures the correlation of the same physicochemical index between two dinucleotides separated by a distance of  $lag$  along the sequence, which can be calculated as:

$$DAC(u, lag) = \sum_{i=1}^{L-lag-1} (P_u(R_i R_{i+1}) - \bar{P}_u)(P_u(R_{i+lag} R_{i+lag+1}) - \bar{P}_u) / (L-lag-1) \quad (2)$$

where  $u$  is a physicochemical index,  $L$  is the length of the DNA sequence,  $P_u(R_i R_{i+1})$  means the numerical value of the physicochemical index  $u$  for the dinucleotide  $R_i R_{i+1}$  at position  $i$ ,  $\bar{P}_u$  is the average value for physicochemical index  $u$  along the whole sequence:

$$\bar{P}_u = \sum_{j=1}^{L-1} P_u(R_j R_{j+1}) / (L-1) \quad (3)$$

In such a way, the length of DAC feature vector is  $N*LAG$ , where  $N$  is the number of physicochemical indices (**Table 1**) extracted from two papers (6,7), and  $LAG$  is the maximum of  $lag$  ( $lag = 1, 2, \dots, LAG$ ).

### 1.2.2 Dinucleotide-based cross covariance (DCC)

Given a DNA sequence **D** (**Eq. 1**), the DCC (4,6) approach measures the correlation of two different physicochemical indices between two dinucleotides separated by  $lag$  nucleic acids along the sequence, which can be calculated by:

$$DCC(u_1, u_2, lag) = \sum_{i=1}^{L-lag-1} (P_{u_1}(R_i R_{i+1}) - \bar{P}_{u_1})(P_{u_2}(R_{i+lag} R_{i+lag+1}) - \bar{P}_{u_2}) / (L-lag-1) \quad (4)$$

where  $u_1, u_2$  are two different physicochemical indices,  $L$  is the length of the DNA sequence,  $P_{u_1}(R_i R_{i+1})$  ( $P_{u_2}(R_i R_{i+1})$ ) is the numerical value of the physicochemical index  $u_1$  ( $u_2$ ) for the dinucleotide  $R_i R_{i+1}$  at position  $i$ ,  $\bar{P}_{u_1}$  ( $\bar{P}_{u_2}$ ) is the average value for physicochemical index value  $u_1$  ( $u_2$ ) along the whole sequence:

$$\bar{P}_u = \sum_{j=1}^{L-1} P_u(R_j R_{j+1}) / (L-1) \quad (5)$$

In such a way, the length of the DCC feature vector is  $N*(N-1)*LAG$ , where  $LAG$  is the maximum of  $lag$  ( $lag=1, 2, \dots, LAG$ );  $N$  is the number of physicochemical indices (**Table 1**).

### 1.2.3 Dinucleotide-based auto-cross covariance (DACC)

DACC (4,6) is a combination of DAC and DCC. Therefore, the length of the DACC feature vector is  $N*N*LAG$ , where  $N$  is the number of physicochemical indices (**Table 1**) and  $LAG$  is the maximum of  $lag$  ( $lag = 1, 2, \dots, LAG$ ).

### 1.2.4 Trinucleotide-based auto covariance (TAC)

Given a DNA sequence **D** (**Eq. 1**), the TAC approach (4-6) measures the correlation of the same physicochemical index between two trinucleotides separated by  $lag$  nucleic acids along the sequence, which can be calculated as:

$$TAC(lag, u) = \sum_{i=1}^{L-lag-2} (P_u(R_i R_{i+1} R_{i+2}) - \bar{P}_u)(P_u(R_{i+lag} R_{i+lag+1} R_{i+lag+2}) - \bar{P}_u) / (L-lag-2) \quad (6)$$

where  $u$  is a physicochemical index,  $L$  is the length of the DNA sequence,  $P_u(R_i R_{i+1} R_{i+2})$  represents the numerical value of the physicochemical index  $u$  for the trinucleotide  $R_i R_{i+1} R_{i+2}$  at position  $i$ ,  $\bar{P}_u$  is the average value for physicochemical index  $u$  along the whole sequence:

$$\bar{P}_u = \sum_{j=1}^{L-2} P_u(R_j R_{j+1} R_{j+2}) / (L-2) \quad (7)$$

In such a way, the length of TAC feature vector is  $N*LAG$ , where  $N$  is the number of physicochemical indices (**Table 2**) extracted from (6), and  $LAG$  is the maximum of  $lag$  ( $lag=1, 2, \dots, LAG$ ).

### 1.2.5 Trinucleotide-based cross covariance (TCC)

Given a DNA sequence  $\mathbf{D}$  (**Eq. 1**), the TCC (4,6) approach measures the correlation of two different physicochemical indices between two trinucleotides separated by  $lag$  nucleic acids along the sequence, which can be calculated by:

$$TCC(u_1, u_2, lag) = \sum_{i=1}^{L-lag-2} (P_{u_1}(R_i R_{i+1} R_{i+2}) - \bar{P}_{u_1})(P_{u_2}(R_{i+lag} R_{i+lag+1} R_{i+lag+2}) - \bar{P}_{u_2}) / (L-lag-2) \quad (8)$$

where  $u_1, u_2$  are two physicochemical indices;  $L$  is the length of the DNA sequence;  $P_{u_1}(R_i R_{i+1} R_{i+2})$  ( $P_{u_2}(R_i R_{i+1} R_{i+2})$ ) represents the numerical value of the physicochemical index  $u_1$  ( $u_2$ ) for the trinucleotide  $R_i R_{i+1} R_{i+2}$  at position  $i$ ;  $\bar{P}_{u_1}$  ( $\bar{P}_{u_2}$ ) is the average value for physicochemical index  $u_1$  ( $u_2$ ) along the whole sequence:

$$\bar{P}_u = \sum_{j=1}^{L-2} P_u(R_j R_{j+1} R_{j+2}) / (L-2) \quad (9)$$

In such a way, the length of TCC feature vector is  $N*(N-1)*LAG$ , where  $N$  is the number of physicochemical index (**Table 2**) extracted from (6), and  $LAG$  is the maximum of  $lag$  ( $lag = 1, 2, \dots, LAG$ ).

### 1.2.6 Trinucleotide-based auto-cross covariance (TACC)

TACC (4,6) is a combination of TAC and TCC. Therefore, the length of the TACC feature vector is  $N*N*LAG$ , where  $N$  is the number of physicochemical indices (**Table 2**) extracted from (6), and  $LAG$  is the maximum of  $lag$  ( $lag = 1, 2, \dots, LAG$ ).

## 1.3 Pseudo deoxyribonucleic acid composition

### 1.3.1 Pseudo dinucleotide composition (PseDNC)

PseDNC (8) is an approach incorporating the contiguous local sequence-order information and the global sequence-order information into the feature vector of the DNA sequence.

Given a DNA sequence  $\mathbf{D}$  (**Eq. 1**), the PseDNC feature vector of  $\mathbf{D}$  is defined:

$$\mathbf{D} = [d_1 \quad d_2 \quad \dots \quad d_{16} \quad d_{16+1} \quad \dots \quad d_{16+\lambda}]^T \quad (10)$$

where

$$d_k = \begin{cases} \frac{f_k}{\sum_{i=1}^{16} f_i + w \sum_{j=1}^{\lambda} \theta_j} & (1 \leq k \leq 16) \\ \frac{w \theta_{k-16}}{\sum_{i=1}^{16} f_i + w \sum_{j=1}^{\lambda} \theta_j} & (17 \leq k \leq 16 + \lambda) \end{cases} \quad (11)$$

where  $f_k$  ( $k=1,2,\dots,16$ ) is the normalized occurrence frequency of dinucleotides in the DNA sequence; the parameter  $\lambda$  is an integer, representing the highest counted rank (or tier) of the correlation along a DNA sequence;  $w$  is the weight factor ranged from 0 to 1;  $\theta_j$  ( $j=1,2,\dots,\lambda$ ) is called the  $j$ -tier correlation factor that reflects the sequence-order correlation between all the most  $j$ -tier contiguous dinucleotides along a DNA sequence, which is defined:

$$\begin{cases} \theta_1 = \frac{1}{L-2} \sum_{i=1}^{L-2} \Theta(\mathbf{R}_i \mathbf{R}_{i+1}, \mathbf{R}_{i+1} \mathbf{R}_{i+2}) \\ \theta_2 = \frac{1}{L-3} \sum_{i=1}^{L-3} \Theta(\mathbf{R}_i \mathbf{R}_{i+1}, \mathbf{R}_{i+2} \mathbf{R}_{i+3}) \\ \theta_3 = \frac{1}{L-4} \sum_{i=1}^{L-4} \Theta(\mathbf{R}_i \mathbf{R}_{i+1}, \mathbf{R}_{i+3} \mathbf{R}_{i+4}) \\ \dots\dots \\ \theta_\lambda = \frac{1}{L-1-\lambda} \sum_{i=1}^{L-1-\lambda} \Theta(\mathbf{R}_i \mathbf{R}_{i+1}, \mathbf{R}_{i+\lambda} \mathbf{R}_{i+\lambda+1}) \end{cases} \quad (\lambda < L) \quad (12)$$

where the correlation function is given by

$$\Theta(\mathbf{R}_i \mathbf{R}_{i+1}, \mathbf{R}_j \mathbf{R}_{j+1}) = \frac{1}{\mu} \sum_{u=1}^{\mu} [P_u(\mathbf{R}_i \mathbf{R}_{i+1}) - P_u(\mathbf{R}_j \mathbf{R}_{j+1})]^2 \quad (13)$$

where  $\mu$  is the number of physicochemical indices, in this approach, 6 indices reflecting the local DNA structural properties (8) (**Table 3**) are employed to generate the PseDNC feature vector;  $P_u(\mathbf{R}_i \mathbf{R}_{i+1})$  ( $P_u(\mathbf{R}_j \mathbf{R}_{j+1})$ ) represents the numerical value of the  $u$ -th ( $u = 1, 2, \dots, \mu$ ) physicochemical index of the dinucleotide  $\mathbf{R}_i \mathbf{R}_{i+1}$  ( $\mathbf{R}_j \mathbf{R}_{j+1}$ ) at position  $i$  ( $j$ ).

### 1.3.2 Pseudo $k$ -tuple nucleotide composition (PseKNC)

PseKNC (9,10) extends the PseDNC approach by incorporating  $k$ -tuple nucleotide composition.

Given a DNA sequence  $\mathbf{D}$  (**Eq. 1**), the feature vector of  $\mathbf{D}$  is defined:

$$\mathbf{D} = [d_1 \quad d_2 \quad \dots \quad d_{4^k} \quad d_{4^{k+1}} \quad \dots \quad d_{4^{k+\lambda}}]^T \quad (14)$$

where

$$d_u = \begin{cases} \frac{f_u}{\sum_{i=1}^{4^k} f_i + w \sum_{j=1}^{\lambda} \theta_j} & (1 \leq u \leq 4^k) \\ \frac{w\theta_{u-4^k}}{\sum_{i=1}^{4^k} f_i + w \sum_{j=1}^{\lambda} \theta_j} & (4^k \leq u \leq 4^k + \lambda) \end{cases} \quad (15)$$

where  $\lambda$  is the number of the total counted ranks (or tiers) of the correlations along a DNA sequence;  $f_u$  ( $u=1,2,\dots,4^k$ ) is the frequency of oligonucleotide that is normalized to  $\sum_{i=1}^{4^k} f_i = 1$ ;  $w$  is a weight factor;  $\theta_j$  is given by

$$\theta_j = \frac{1}{L-j-1} \sum_{i=1}^{L-j-1} \Theta(\mathbf{R}_i \mathbf{R}_{i+1}, \mathbf{R}_{i+j} \mathbf{R}_{i+j+1}) \quad (j = 1, 2, \dots, \lambda; \lambda < L) \quad (16)$$

which represents the  $j$ -tier structural correlation factor between all the  $j$ -th most contiguous dinucleotides. The correlation function  $\Theta(\mathbf{R}_i \mathbf{R}_{i+1}, \mathbf{R}_{i+j} \mathbf{R}_{i+j+1})$  is defined by

$$\Theta(\mathbf{R}_i \mathbf{R}_{i+1}, \mathbf{R}_{i+j} \mathbf{R}_{i+j+1}) = \frac{1}{\mu} \sum_{v=1}^{\mu} [P_v(\mathbf{R}_i \mathbf{R}_{i+1}) - P_v(\mathbf{R}_{i+j} \mathbf{R}_{i+j+1})]^2 \quad (17)$$

where  $\mu$  is the number of physicochemical indices, in this study, 6 indices reflecting the local DNA structural properties (8) (**Table 3**) are employed to generate the PseKNC feature vector;  $P_v(\mathbf{R}_i \mathbf{R}_{i+1})$  ( $P_v(\mathbf{R}_{i+j} \mathbf{R}_{i+j+1})$ ) represents the numerical value of the  $v$ -th ( $v = 1, 2, \dots, \mu$ ) physicochemical index for the dinucleotide  $\mathbf{R}_i \mathbf{R}_{i+1}$  ( $\mathbf{R}_{i+j} \mathbf{R}_{i+j+1}$ ) at position  $i$  ( $i+j$ ).

For more information about this approach, please refer to (9,10).

### 1.3.3 General parallel correlation pseudo dinucleotide composition (PC-PseDNC-General)

In PC-PseDNC-General (11) approach, the users cannot only select the 148 built-in physicochemical indices (**Table 1**), but also can upload their own indices to generate the PC-PseDNC-General feature vector.

Given a DNA sequence  $\mathbf{D}$  (**Eq. 1**), the PC-PseDNC-General feature vector of  $\mathbf{D}$  is defined:

$$\mathbf{D} = [d_1 \ d_2 \ \dots \ d_{16} \ d_{16+1} \ \dots \ d_{16+\lambda}]^T \quad (18)$$

where

$$d_k = \begin{cases} \frac{f_k}{\sum_{i=1}^{16} f_i + w \sum_{j=1}^{\lambda} \theta_j} & (1 \leq k \leq 16) \\ \frac{w\theta_{k-16}}{\sum_{i=1}^{16} f_i + w \sum_{j=1}^{\lambda} \theta_j} & (16+1 \leq k \leq 16+\lambda) \end{cases} \quad (19)$$

where  $f_k$  ( $k=1,2,\dots,16$ ) is the normalized occurrence frequency of dinucleotides in the DNA sequence; the parameter  $\lambda$  is an integer, representing the highest counted rank (or tier) of the correlation along a DNA sequence;  $w$  is the weight factor ranging from

0 to 1;  $\theta_j$  ( $j=1, 2, \dots, \lambda$ ) is called the  $j$ -tier correlation factor that reflects the sequence-order correlation between all the most contiguous dinucleotides along a DNA sequence, which is defined:

$$\left\{ \begin{array}{l} \theta_1 = \frac{1}{L-2} \sum_{i=1}^{L-2} \Theta(\mathbf{R}_i \mathbf{R}_{i+1}, \mathbf{R}_{i+1} \mathbf{R}_{i+2}) \\ \theta_2 = \frac{1}{L-3} \sum_{i=1}^{L-3} \Theta(\mathbf{R}_i \mathbf{R}_{i+1}, \mathbf{R}_{i+2} \mathbf{R}_{i+3}) \\ \theta_3 = \frac{1}{L-4} \sum_{i=1}^{L-4} \Theta(\mathbf{R}_i \mathbf{R}_{i+1}, \mathbf{R}_{i+3} \mathbf{R}_{i+4}) \\ \dots\dots \\ \theta_\lambda = \frac{1}{L-1-\lambda} \sum_{i=1}^{L-1-\lambda} \Theta(\mathbf{R}_i \mathbf{R}_{i+1}, \mathbf{R}_{i+\lambda} \mathbf{R}_{i+\lambda+1}) \end{array} \right. \quad (\lambda < L-1) \quad (20)$$

where the correlation function is given by

$$\Theta(\mathbf{R}_i \mathbf{R}_{i+1}, \mathbf{R}_j \mathbf{R}_{j+1}) = \frac{1}{\mu} \sum_{u=1}^{\mu} [P_u(\mathbf{R}_i \mathbf{R}_{i+1}) - P_u(\mathbf{R}_j \mathbf{R}_{j+1})]^2 \quad (21)$$

where  $\mu$  is the number of physicochemical indices listed in the **Table 1**;  $P_u(\mathbf{R}_i \mathbf{R}_{i+1})$  ( $P_u(\mathbf{R}_j \mathbf{R}_{j+1})$ ) represents the numerical value of the  $u$ -th ( $u=1, 2, \dots, \mu$ ) physicochemical index for the dinucleotide  $\mathbf{R}_i \mathbf{R}_{i+1}$  ( $\mathbf{R}_j \mathbf{R}_{j+1}$ ) at position  $i$  ( $j$ ).

### 1.3.4 General parallel correlation pseudo trinucleotide composition (PC-PseTNC-General)

In PC-PseTNC-General (11) approach, the users cannot only select the 12 built-in physicochemical indices (**Table 2**), but also can upload their own indices to generate the PC-PseTNC-General feature vector.

Given a DNA sequence **D** (**Eq. 1**), the PC-PseTNC-General feature vector of **D** is defined:

$$\mathbf{D} = [d_1 \quad d_2 \quad \dots \quad d_{64} \quad d_{64+1} \quad \dots \quad d_{64+\lambda}]^T \quad (22)$$

where

$$d_k = \begin{cases} \frac{f_k}{\sum_{i=1}^{64} f_i + w \sum_{j=1}^{\lambda} \theta_j} & (1 \leq k \leq 64) \\ \frac{w \theta_{k-64}}{\sum_{i=1}^{64} f_i + w \sum_{j=1}^{\lambda} \theta_j} & (64+1 \leq k \leq 64 + \lambda) \end{cases} \quad (23)$$

where  $f_k$  ( $k=1, 2, \dots, 64$ ) is the normalized occurrence frequency of trinucleotide in the DNA sequence; the parameter  $\lambda$  is an integer, representing the highest counted rank (or tier) of the correlation along a DNA sequence;  $w$  is the weight factor ranging from 0 to 1;  $\theta_j$  ( $j=1, 2, \dots, \lambda$ ) is called the  $j$ -tier correlation factor that reflects the sequence-order correlation between all the most contiguous trinucleotides along a DNA sequence, which is defined:



$$\left\{ \begin{array}{l} \theta_1 = \frac{1}{L-3} \sum_{i=1}^{L-3} \Theta(\mathbf{R}_i \mathbf{R}_{i+1} \mathbf{R}_{i+2}, \mathbf{R}_{i+1} \mathbf{R}_{i+2} \mathbf{R}_{i+3}) \\ \theta_2 = \frac{1}{L-4} \sum_{i=1}^{L-4} \Theta(\mathbf{R}_i \mathbf{R}_{i+1} \mathbf{R}_{i+2}, \mathbf{R}_{i+2} \mathbf{R}_{i+3} \mathbf{R}_{i+4}) \\ \theta_3 = \frac{1}{L-5} \sum_{i=1}^{L-5} \Theta(\mathbf{R}_i \mathbf{R}_{i+1} \mathbf{R}_{i+2}, \mathbf{R}_{i+3} \mathbf{R}_{i+4} \mathbf{R}_{i+5}) \\ \dots\dots \\ \theta_\lambda = \frac{1}{L-2-\lambda} \sum_{i=1}^{L-2-\lambda} \Theta(\mathbf{R}_i \mathbf{R}_{i+1} \mathbf{R}_{i+2}, \mathbf{R}_{i+\lambda} \mathbf{R}_{i+\lambda+1} \mathbf{R}_{i+\lambda+2}) \end{array} \right. \quad (\lambda < L-2) \quad (24)$$

where the correlation function is given by

$$\Theta(\mathbf{R}_i \mathbf{R}_{i+1} \mathbf{R}_{i+2}, \mathbf{R}_j \mathbf{R}_{j+1} \mathbf{R}_{j+2}) = \frac{1}{\mu} \sum_{u=1}^{\mu} [P_u(\mathbf{R}_i \mathbf{R}_{i+1} \mathbf{R}_{i+2}) - P_u(\mathbf{R}_j \mathbf{R}_{j+1} \mathbf{R}_{j+2})]^2 \quad (25)$$

where  $\mu$  is the number of physicochemical indices considered that are listed in the **Table 2**;  $P_u(\mathbf{R}_i \mathbf{R}_{i+1} \mathbf{R}_{i+2})$  ( $P_u(\mathbf{R}_j \mathbf{R}_{j+1} \mathbf{R}_{j+2})$ ) represents the numerical value of the  $u$ -th ( $u=1, 2, \dots, \mu$ ) physicochemical index for the tri-nucleotide  $\mathbf{R}_i \mathbf{R}_{i+1} \mathbf{R}_{i+2}$  ( $\mathbf{R}_j \mathbf{R}_{j+1} \mathbf{R}_{j+2}$ ) at position  $i$  ( $j$ ).

### 1.3.5 General series correlation pseudo dinucleotide composition (SC-PseDNC-General)

SC-PseDNC-General (11) is a variant of PC-PseDNC-General, which differs in the equations of calculating the correlation factors reflecting the sequence-order correlation between all the most contiguous dinucleotides along a DNA sequence.

Given a DNA sequence **D** (**Eq. 1**), the SC-PseDNC-General feature vector of **D** is defined:

$$\mathbf{D} = [d_1 \quad d_2 \quad \dots \quad d_{16} \quad d_{16+1} \quad \dots \quad d_{16+\lambda} \quad d_{16+\lambda+1} \quad \dots \quad d_{16+\lambda\Lambda}]^T \quad (26)$$

where

$$d_k = \begin{cases} \frac{f_k}{\sum_{i=1}^{16} f_i + w \sum_{j=1}^{\lambda\Lambda} \theta_j} & (1 \leq k \leq 16) \\ \frac{w\theta_{k-16}}{\sum_{i=1}^{16} f_i + w \sum_{j=1}^{\lambda\Lambda} \theta_j} & (17 \leq k \leq 16 + \lambda\Lambda) \end{cases} \quad (27)$$

where  $f_k$  ( $k=1, 2, \dots, 16$ ) is the normalized occurrence frequency of dinucleotide in the DNA sequence; the parameter  $\lambda$  is an integer, representing the highest counted rank (or tier) of the correlation along a DNA sequence;  $w$  is the weight factor ranging from 0 to 1;  $\Lambda$  is the number of physicochemical indices (**Table 1**);  $\theta_j$  ( $j=1, 2, \dots, \lambda$ ) is called the  $j$ -tier correlation factor that reflects the sequence-order correlation between all the most contiguous dinucleotides along a DNA sequence, which is defined:

$$\left\{ \begin{array}{l} \theta_1 = \frac{1}{L-3} \sum_{i=1}^{L-3} J_{i,i+1}^1 \\ \theta_2 = \frac{1}{L-3} \sum_{i=1}^{L-3} J_{i,i+1}^2 \\ \dots\dots \\ \theta_\Lambda = \frac{1}{L-3} \sum_{i=1}^{L-3} J_{i,i+1}^\Lambda \quad \lambda < (L-2) \\ \dots\dots \\ \theta_{\lambda\Lambda-1} = \frac{1}{L-\lambda-2} \sum_{i=1}^{L-\lambda-2} J_{i,i+\lambda}^{\Lambda-1} \\ \theta_{\lambda\Lambda} = \frac{1}{L-\lambda-2} \sum_{i=1}^{L-\lambda-2} J_{i,i+\lambda}^\Lambda \end{array} \right. \quad (28)$$

The correlation function is given by

$$J_{i,i+m}^u = P_u(\mathbf{R}_i \mathbf{R}_{i+1}) \cdot P_u(\mathbf{R}_{i+m} \mathbf{R}_{i+m+1}) \quad (u=1,2,\dots,\Lambda; m=1,2,\dots,\lambda; i=1,2,\dots,L-m-1) \quad (29)$$

where  $P_u(\mathbf{R}_i \mathbf{R}_{i+1}) (P_u(\mathbf{R}_{i+m} \mathbf{R}_{i+m+1}))$  represents the numerical value of the  $u$ -th ( $u=1, 2, \dots, \mu$ ) physiochemical index for the dinucleotide  $\mathbf{R}_i \mathbf{R}_{i+1} (\mathbf{R}_{i+m} \mathbf{R}_{i+m+1})$  at position  $i (i+m)$ .

### 1.3.6 General series correlation pseudo trinucleotide composition (SC-PseTNC-General)

SC-PseTNC-General (11) is a variant of PC-PseTNC-General, which differs in the equations of calculating the correlation factors reflecting the sequence-order correlation between all the most contiguous dinucleotides along a DNA sequence.

Given a DNA sequence  $\mathbf{D}$  (Eq. 1), the SC-PseTNC-General feature vector of  $\mathbf{D}$  is defined:

$$\mathbf{D} = [d_1 \quad d_2 \quad \dots \quad d_{64} \quad d_{64+1} \quad \dots \quad d_{64+\lambda} \quad d_{64+\lambda+1} \quad \dots \quad d_{64+\lambda\Lambda}]^T \quad (30)$$

where

$$d_k = \begin{cases} \frac{f_k}{\sum_{i=1}^{64} f_i + w \sum_{j=1}^{\lambda\Lambda} \theta_j} & (1 \leq k \leq 64) \\ \frac{w\theta_{k-64}}{\sum_{i=1}^{64} f_i + w \sum_{j=1}^{\lambda\Lambda} \theta_j} & (64+1 \leq k \leq 64+\lambda\Lambda) \end{cases} \quad (31)$$

where  $f_k$  ( $k=1, 2, \dots, 64$ ) is the normalized occurrence frequency of trinucleotide in the DNA sequence; the parameter  $\lambda$  is an integer, representing the highest counted rank (or tier) of the correlation along a DNA sequence;  $w$  is the weight factor ranging from 0 to 1;  $\Lambda$  is the number of physicochemical indices (Table 2);  $\theta_j$  ( $j=1, 2, \dots, \lambda$ ) is called the  $j$ -tier correlation factor reflecting the sequence-order correlation between all the most contiguous trinucleotides along a DNA sequence, which is defined:

$$\left\{ \begin{array}{l} \theta_1 = \frac{1}{L-4} \sum_{i=1}^{L-4} J_{i,i+1}^1 \\ \theta_2 = \frac{1}{L-4} \sum_{i=1}^{L-4} J_{i,i+1}^2 \\ \dots\dots \\ \theta_\Lambda = \frac{1}{L-4} \sum_{i=1}^{L-4} J_{i,i+1}^\Lambda \quad \lambda < (L-3) \\ \dots\dots \\ \theta_{\lambda\Lambda-1} = \frac{1}{L-\lambda-3} \sum_{i=1}^{L-\lambda-3} J_{i,i+\lambda}^{\Lambda-1} \\ \theta_{\lambda\Lambda} = \frac{1}{L-\lambda-3} \sum_{i=1}^{L-\lambda-3} J_{i,i+\lambda}^\Lambda \end{array} \right. \quad (32)$$

The correlation function is given by

$$\left\{ \begin{array}{l} J_{i,i+m}^u = P_u(\mathbf{R}_i \mathbf{R}_{i+1} \mathbf{R}_{i+2}) \cdot P_u(\mathbf{R}_{i+m} \mathbf{R}_{i+m+1} \mathbf{R}_{i+m+2}) \\ u = 1, 2, \dots, \Lambda; m = 1, 2, \dots, \lambda; i = 1, 2, \dots, L-m-2 \end{array} \right. \quad (33)$$

where  $P_u(\mathbf{R}_i \mathbf{R}_{i+1} \mathbf{R}_{i+2})$  ( $P_u(\mathbf{R}_{i+m} \mathbf{R}_{i+m+1} \mathbf{R}_{i+m+2})$ ) represents the numerical value of the  $u$ -th ( $u = 1, 2, \dots, \mu$ ) physiochemical index for the tri-nucleotide  $\mathbf{R}_i \mathbf{R}_{i+1} \mathbf{R}_{i+2}$  ( $\mathbf{R}_{i+m} \mathbf{R}_{i+m+1} \mathbf{R}_{i+m+2}$ ) at position  $i$  ( $i+m$ ).

## 2. RNA

### 2.1 Ribonucleic acid composition

#### 2.1.1 Basic kmer (Kmer)

Basic kmer (12) is the simplest approach to represent the RNAs, in which the RNA sequences are represented as the occurrence frequencies of  $k$  neighboring nucleic acids.

### 2.2 Autocorrelation

#### 2.2.1 Dinucleotide-based auto covariance (DAC)

Suppose an RNA sequence  $\mathbf{R}$  with  $L$  nucleic acid residues; i.e.

$$\mathbf{R} = \mathbf{R}_1 \mathbf{R}_2 \mathbf{R}_3 \mathbf{R}_4 \mathbf{R}_5 \mathbf{R}_6 \mathbf{R}_7 \dots \mathbf{R}_L \quad (34)$$

where  $\mathbf{R}_1$  represents the nucleic acid residue at the sequence position 1,  $\mathbf{R}_2$  the nucleic acid residue at position 2, and so forth.

The DAC (4-6) measures the correlation of the same physiochemical index between two dinucleotides separated by a distance of  $lag$  along the sequence, which can be calculated as:

$$\text{DAC}(u, lag) = \sum_{i=1}^{L-lag-1} (P_u(\mathbf{R}_i \mathbf{R}_{i+1}) - \bar{P}_u)(P_u(\mathbf{R}_{i+lag} \mathbf{R}_{i+lag+1}) - \bar{P}_u) / (L-lag-1) \quad (35)$$

where  $u$  is a physicochemical index;  $L$  is the length of the RNA sequence,  $P_u(\mathbf{R}_i \mathbf{R}_{i+1})$  ( $P_u(\mathbf{R}_{i+lag} \mathbf{R}_{i+lag+1})$ ) means the numerical value of the physicochemical index  $u$  for the dinucleotide  $\mathbf{R}_i \mathbf{R}_{i+1}$  ( $\mathbf{R}_{i+lag} \mathbf{R}_{i+lag+1}$ ) at position  $i$  ( $i+lag$ ),  $\bar{P}_u$  is the average value for physicochemical index  $u$  along the whole sequence:

$$\bar{P}_u = \sum_{j=1}^{L-1} P_u(\mathbf{R}_j \mathbf{R}_{j+1}) / (L-1) \quad (36)$$

In such a way, the length of DAC feature vector is  $N*LAG$ , where  $N$  is the number of physicochemical indices (**Table 4**), which are extracted from (6,7), and LAG is the maximum of  $lag$  ( $lag = 1, 2, \dots, LAG$ ).

### 2.2.2 Dinucleotide-based cross covariance (DCC)

Given an RNA sequence  $\mathbf{R}$  (**Eq. 34**), the DCC (4,6) approach measures the correlation of two different physicochemical indices between two dinucleotides separated by  $lag$  nucleic acids along the sequence, which can be calculated by:

$$\text{DCC}(u_1, u_2, lag) = \sum_{i=1}^{L-lag-1} (P_{u_1}(\mathbf{R}_i \mathbf{R}_{i+1}) - \bar{P}_{u_1})(P_{u_2}(\mathbf{R}_{i+lag} \mathbf{R}_{i+lag+1}) - \bar{P}_{u_2}) / (L-lag-1) \quad (37)$$

where  $u_1, u_2$  are two different physicochemical indices,  $L$  is the length of the RNA sequence,  $P_{u_1}(\mathbf{R}_i \mathbf{R}_{i+1})$  ( $P_{u_2}(\mathbf{R}_i \mathbf{R}_{i+1})$ ) is the numerical value of the physicochemical index  $u_1$  ( $u_2$ ) for the dinucleotide  $\mathbf{R}_i \mathbf{R}_{i+1}$  at position  $i$ ,  $\bar{P}_{u_1}$  ( $\bar{P}_{u_2}$ ) is the average value for physicochemical index value  $u_1$  ( $u_2$ ) along the whole sequence:

$$\bar{P}_u = \sum_{j=1}^{L-1} P_u(\mathbf{R}_j \mathbf{R}_{j+1}) / (L-1) \quad (38)$$

In such a way, the length of the DCC feature vector is  $N*(N-1)*LAG$ , where  $N$  is the number of physicochemical indices (**Table 4**) and LAG is the maximum of  $lag$  ( $lag=1, 2, \dots, LAG$ ).

### 2.2.3 Dinucleotide-based auto-cross covariance (DACC)

DACC (4,6) is a combination of DAC and DCC. Therefore, the length of the DACC feature vector is  $N*N*LAG$ , where  $N$  is the number of physicochemical indices (**Table 4**) and LAG is the maximum of  $lag$  ( $lag = 1, 2, \dots, LAG$ ).

## 2.3 Pseudo ribonucleic acid composition

### 2.3.1 General parallel correlation pseudo dinucleotide composition (PC-PseDNC-General)

In PC-PseDNC-General (6) approach, the users cannot only select the 22 built-in physiochemical indices (**Table 4**), but also can upload their own indices to generate the PC-PseDNC-General feature vector.

Given an RNA sequence  $\mathbf{R}$  (**Eq. 34**), the PC-PseDNC-General feature vector of  $\mathbf{R}$  is defined:

$$\mathbf{R} = [d_1 \quad d_2 \quad \cdots \quad d_{16} \quad d_{16+1} \quad \cdots \quad d_{16+\lambda}]^T \quad (39)$$

where

$$d_k = \begin{cases} \frac{f_k}{\sum_{i=1}^{16} f_i + w \sum_{j=1}^{\lambda} \theta_j} & (1 \leq k \leq 16) \\ \frac{w \theta_{k-16}}{\sum_{i=1}^{16} f_i + w \sum_{j=1}^{\lambda} \theta_j} & (16+1 \leq k \leq 16+\lambda) \end{cases} \quad (40)$$

where  $f_k$  ( $k=1,2,\dots,16$ ) is the normalized occurrence frequency of dinucleotide in the RNA sequence; the parameter  $\lambda$  is an integer, representing the highest counted rank (or tier) of the correlation along a RNA sequence;  $w$  is the weight factor ranging from 0 to 1;  $\theta_j$  ( $j=1, 2, \dots, \lambda$ ) is called the  $j$ -tier correlation factor reflecting the sequence-order correlation between all the  $i$ -th most contiguous dinucleotides along an RNA sequence, which is defined:

$$\left\{ \begin{array}{l} \theta_1 = \frac{1}{L-2} \sum_{i=1}^{L-2} \Theta(\mathbf{R}_i \mathbf{R}_{i+1}, \mathbf{R}_{i+1} \mathbf{R}_{i+2}) \\ \theta_2 = \frac{1}{L-3} \sum_{i=1}^{L-3} \Theta(\mathbf{R}_i \mathbf{R}_{i+1}, \mathbf{R}_{i+2} \mathbf{R}_{i+3}) \\ \theta_3 = \frac{1}{L-4} \sum_{i=1}^{L-4} \Theta(\mathbf{R}_i \mathbf{R}_{i+1}, \mathbf{R}_{i+3} \mathbf{R}_{i+4}) \\ \dots\dots \\ \theta_\lambda = \frac{1}{L-1-\lambda} \sum_{i=1}^{L-1-\lambda} \Theta(\mathbf{R}_i \mathbf{R}_{i+1}, \mathbf{R}_{i+\lambda} \mathbf{R}_{i+\lambda+1}) \end{array} \right. \quad (\lambda < L) \quad (41)$$

where the correlation function is given by

$$\Theta(\mathbf{R}_i \mathbf{R}_{i+1}, \mathbf{R}_j \mathbf{R}_{j+1}) = \frac{1}{\mu} \sum_{u=1}^{\mu} [P_u(\mathbf{R}_i \mathbf{R}_{i+1}) - P_u(\mathbf{R}_j \mathbf{R}_{j+1})]^2 \quad (42)$$

where  $\mu$  is the number of physicochemical indices considered that are listed in the **Table 4**;  $P_u(\mathbf{R}_i \mathbf{R}_{i+1})$  ( $P_u(\mathbf{R}_j \mathbf{R}_{j+1})$ ) represents the numerical value of the  $u$ -th ( $u=1,2,\dots,\mu$ ) physicochemical index for the dinucleotide  $\mathbf{R}_i \mathbf{R}_{i+1}$  ( $\mathbf{R}_j \mathbf{R}_{j+1}$ ) at position  $i$  ( $j$ ).

### 2.3.2 General series correlation pseudo dinucleotide composition (SC-PseDNC-General)

SC-PseDNC-General (6) is a variant of PC-PseDNC-General, which differs in the equations of calculating the correlation factors reflecting the sequence-order correlation between all the most contiguous dinucleotides along an RNA sequence.

Given an RNA sequence  $\mathbf{R}$  (Eq. 34), the SC-PseDNC-General feature vector of  $\mathbf{R}$  is defined:

$$\mathbf{R} = [d_1 \quad d_2 \quad \cdots \quad d_{16} \quad d_{16+1} \quad \cdots \quad d_{16+\lambda} \quad d_{16+\lambda+1} \quad \cdots \quad d_{16+\lambda\Lambda}]^T \quad (43)$$

where

$$d_k = \begin{cases} \frac{f_k}{\sum_{i=1}^{16} f_i + w \sum_{j=1}^{\lambda\Lambda} \theta_j} & (1 \leq k \leq 16) \\ \frac{w\theta_{k-16}}{\sum_{i=1}^{16} f_i + w \sum_{j=1}^{\lambda\Lambda} \theta_j} & (16+1 \leq k \leq 16+\lambda\Lambda) \end{cases} \quad (44)$$

where  $f_k$  ( $k=1, 2, \dots, 16$ ) is the normalized occurrence frequency of dinucleotides in the RNA sequence; the parameter  $\lambda$  is an integer, representing the highest counted rank (or tier) of the correlation along an RNA sequence;  $w$  is the weight factor ranging from 0 to 1;  $\Lambda$  is the number of physicochemical indices (Table 4);  $\theta_j$  ( $j = 1, 2, \dots, \lambda$ ) is called the  $j$ -tier correlation factor reflecting the sequence-order correlation between all the  $j$ -th most contiguous dinucleotides along an RNA sequence, which is defined:

$$\left\{ \begin{array}{l} \theta_1 = \frac{1}{L-3} \sum_{i=1}^{L-3} J_{i,i+1}^1 \\ \theta_2 = \frac{1}{L-3} \sum_{i=1}^{L-3} J_{i,i+1}^2 \\ \dots\dots \\ \theta_\Lambda = \frac{1}{L-3} \sum_{i=1}^{L-3} J_{i,i+1}^\Lambda \quad \lambda < (L-2) \\ \dots\dots \\ \theta_{\lambda\Lambda-1} = \frac{1}{L-\lambda-2} \sum_{i=1}^{L-\lambda-2} J_{i,i+\lambda}^{\Lambda-1} \\ \theta_{\lambda\Lambda} = \frac{1}{L-\lambda-2} \sum_{i=1}^{L-\lambda-2} J_{i,i+\lambda}^\Lambda \end{array} \right. \quad (45)$$

The correlation function is given by

$$\left\{ \begin{array}{l} J_{i,i+m}^u = P_u(\mathbf{R}_i \mathbf{R}_{i+1}) \cdot P_u(\mathbf{R}_{i+m} \mathbf{R}_{i+m+1}) \\ u = 1, 2, \dots, \Lambda; m = 1, 2, \dots, \lambda; i = 1, 2, \dots, L-\lambda-2 \end{array} \right. \quad (46)$$

$P_u(\mathbf{R}_i \mathbf{R}_{i+1})(P_u(\mathbf{R}_{i+m} \mathbf{R}_{i+m+1}))$  represents the numerical value of the  $u$ -th ( $u = 1, 2, \dots, \mu$ ) physicochemical index for the dinucleotide  $\mathbf{R}_i \mathbf{R}_{i+1}(\mathbf{R}_{i+m} \mathbf{R}_{i+m+1})$  at position  $i$  ( $i+m$ ).

### 3. Protein

#### 3.1 Amino acid composition

### 3.1.1 Basic kmer (Kmer)

Basic kmer (13) is the simplest approach to represent the proteins, in which the protein sequences are represented as the occurrence frequencies of  $k$  neighboring amino acids.

## 3.2 Autocorrelation

### 3.2.1 Auto covariance (AC)

Suppose a protein sequence  $\mathbf{P}$  with  $L$  amino acid residues; i.e.

$$\mathbf{P} = R_1 R_2 R_3 R_4 R_5 R_6 R_7 \cdots R_L \quad (47)$$

where  $R_1$  represents the amino acid residue at the sequence position 1,  $R_2$  the amino acid residue at position 2 and so forth.

The AC (4,5,14) approach measures the correlation of the same property between two residues separated by a distance of  $lag$  along the sequence, which can be calculated as:

$$AC(i, lag) = \sum_{i=1}^{L-lag} (P_u(R_i) - \bar{P}_u)(P_u(R_{i+lag}) - \bar{P}_u) / (L-lag) \quad (48)$$

where  $u$  is a physicochemical index,  $L$  is the length of the protein sequence,  $P_u(R_i)$  means the numerical value of the physicochemical index  $u$  for the amino acid  $R_i$  at position  $i$ ,  $\bar{P}_u$  is the average value for physicochemical index  $u$  along the whole sequence:

$$\bar{P}_u = \sum_{j=1}^L P_u(R_j) / L \quad (49)$$

In such a way, the length of AC feature vector is  $N*LAG$ , where  $N$  is the number of physicochemical indices (**Table 5**) extracted from AAindex (15); LG is the maximum of  $lag$  ( $lag=1,2,\dots, LG$ ).

For more information of this approach, please refer to (4,5).

### 3.2.2 Cross covariance (CC)

Given a protein sequence  $\mathbf{P}$  (**Eq.47**), the CC (4,5,14) approach measures the correlation of two different properties between two residues separated by a distance of  $lag$  along the sequence, which can be calculated by:

$$CC(u_1, u_2, lag) = \sum_{i=1}^{L-lag} (P_{u_1}(R_i) - \bar{P}_{u_1})(P_{u_2}(R_{i+lag}) - \bar{P}_{u_2}) / (L-lag) \quad (50)$$

where  $u_1, u_2$  are two different physicochemical indices,  $L$  is the length of the protein sequence,  $P_{u_1}(R_i)$  ( $P_{u_2}(R_{i+lag})$ ) is the numerical value of the physicochemical index  $u_1$  ( $u_2$ ) for the amino acid  $R_i$  ( $R_{i+lag}$ ) at position  $i$  ( $i+lag$ ),  $\bar{P}_{u_1}$  ( $\bar{P}_{u_2}$ ) is the average value for physicochemical index value  $u_1$  ( $u_2$ ) along the whole sequence:

$$\overline{P}_u = \sum_{j=1}^L P_u(R_j) / L \quad (51)$$

In such a way, the length of the CC feature vector is  $N*(N-1)*LAG$ , where  $N$  is the number of physicochemical indices (**Table 5**) and LAG is the maximum of  $lag$  ( $lag=1, 2, \dots, LAG$ ).

For more information of this approach, please refer to (4,5).

### 3.2.3 Auto-cross covariance (ACC)

ACC (4,5,14) is a combination of AC and CC. Therefore, the length of the ACC feature vector is  $N*N*LAG$ , where  $N$  is the number of physicochemical indices (**Table 5**) and LAG is the maximum of  $lag$  ( $lag = 1, 2, \dots, LAG$ ).

## 3.3 Pseudo amino acid composition

### 3.3.1 Parallel correlation pseudo amino acid composition (PC-PseAAC)

PC-PseAAC (16) is an approach incorporating the contiguous local sequence-order information and the global sequence-order information into the feature vector of the protein sequence.

Given a Protein sequence **P** (**Eq.47**), the PC-PseAAC feature vector of **P** is defined:

$$\mathbf{P} = [x_1 \quad x_2 \quad \cdots \quad x_{20} \quad x_{20+1} \quad \cdots \quad x_{20+\lambda}]^T \quad (52)$$

where

$$x_u = \begin{cases} \frac{f_u}{\sum_{i=1}^{20} f_i + w \sum_{j=1}^{\lambda} \theta_j} & (1 \leq u \leq 20) \\ \frac{w \theta_{u-20}}{\sum_{i=1}^{20} f_i + w \sum_{j=1}^{\lambda} \theta_j} & (20+1 \leq u \leq 20+\lambda) \end{cases} \quad (53)$$

where  $f_i$  ( $i=1,2,\dots,20$ ) is the normalized occurrence frequency of the 20 amino acids in the protein **P**; the parameter  $\lambda$  is an integer, representing the highest counted rank (or tier) of the correlation along a protein sequence;  $w$  is the weight factor ranging from 0 to 1;  $\theta_j$  ( $j=1,2,\dots,\lambda$ ) is called the  $j$ -tier correlation factor reflecting the sequence-order correlation between all the  $j$ -th most contiguous residues along a protein chain, which is defined:



$$\left\{ \begin{array}{l} \theta_1 = \frac{1}{L-1} \sum_{i=1}^{L-1} \Theta(\mathbf{R}_i, \mathbf{R}_{i+1}) \\ \theta_2 = \frac{1}{L-2} \sum_{i=1}^{L-2} \Theta(\mathbf{R}_i, \mathbf{R}_{i+2}) \\ \theta_3 = \frac{1}{L-3} \sum_{i=1}^{L-3} \Theta(\mathbf{R}_i, \mathbf{R}_{i+3}) \\ \dots\dots \\ \theta_\lambda = \frac{1}{L-\lambda} \sum_{i=1}^{L-\lambda} \Theta(\mathbf{R}_i, \mathbf{R}_{i+\lambda}) \end{array} \right. \quad (\lambda < L) \quad (54)$$

where the correlation function is given by

$$\Theta(\mathbf{R}_i, \mathbf{R}_j) = \frac{1}{3} \left\{ [H_1(\mathbf{R}_j) - H_1(\mathbf{R}_i)]^2 + [H_2(\mathbf{R}_j) - H_2(\mathbf{R}_i)]^2 + [M(\mathbf{R}_j) - M(\mathbf{R}_i)]^2 \right\} \quad (55)$$

where  $H_1(\mathbf{R}_i)$ ,  $H_2(\mathbf{R}_i)$ , and  $M(\mathbf{R}_i)$  are, respectively, the hydrophobicity value, hydrophilicity value, and side-chain mass (**Table 6**) of the amino acid  $\mathbf{R}_i$ ; Note that before substituting the values of hydrophobicity, hydrophilicity, and side-chain mass into **Eq. 55**, they are all subjected to a standard conversion as described by the following equation:

$$\left\{ \begin{array}{l} H_1(i) = \frac{H_1^0(i) - \sum_{i=1}^{20} \frac{H_1^0(i)}{20}}{\sqrt{\frac{\sum_{i=1}^{20} [H_1^0(i) - \sum_{i=1}^{20} \frac{H_1^0(i)}{20}]^2}{20}}} \\ H_2(i) = \frac{H_2^0(i) - \sum_{i=1}^{20} \frac{H_2^0(i)}{20}}{\sqrt{\frac{\sum_{i=1}^{20} [H_2^0(i) - \sum_{i=1}^{20} \frac{H_2^0(i)}{20}]^2}{20}}} \\ M(i) = \frac{M^0(i) - \sum_{i=1}^{20} \frac{M^0(i)}{20}}{\sqrt{\frac{\sum_{i=1}^{20} [M^0(i) - \sum_{i=1}^{20} \frac{M^0(i)}{20}]^2}{20}}} \end{array} \right. \quad (56)$$

where  $H_1^0(i)$  is the original hydrophobicity value of the  $i$ -th amino acid;  $H_2^0(i)$  the corresponding original hydrophilicity value;  $M^0(i)$  the mass of the  $i$ -th amino acid side chain.

### 3.3.2 Series correlation pseudo amino acid composition (SC-PseAAC)

SC-PseAAC (17) is a variant of PC-PseAAC. Given a protein sequence  $\mathbf{P}$  (**Eq.47**), the SC-PseAAC feature vector of  $\mathbf{P}$  is defined:

$$\mathbf{P} = [p_1 \ p_2 \ \dots \ p_{20} \ p_{20+1} \ \dots \ p_{20+\lambda} \ p_{20+\lambda+1} \ \dots \ p_{20+2\lambda}]^T \quad (57)$$

where

$$p_u = \begin{cases} \frac{f_u}{\sum_{i=1}^{20} f_i + w \sum_{j=1}^{2\lambda} \tau_j} & (1 \leq u \leq 20) \\ \frac{w \tau_{u-20}}{\sum_{i=1}^{20} f_i + w \sum_{j=1}^{2\lambda} \tau_j} & (20+1 \leq u \leq 20+2\lambda) \end{cases} \quad (58)$$

where  $f_i$  ( $i = 1, 2, \dots, 20$ ) is the normalized occurrence frequency of the 20 native amino acids in the protein  $\mathbf{P}$ ; the parameter  $\lambda$  is an integer, representing the highest counted rank (or tier) of the correlation along a protein sequence;  $w$  is the weight factor ranging from 0 to 1;  $\tau_j$  the  $j$ -tier sequence-correlation factor that reflects the sequence-order correlation between all the most contiguous residues along a protein sequence, which is defined:

$$\left\{ \begin{array}{l} \tau_1 = \frac{1}{L-1} \sum_{i=1}^{L-1} H_{i,i+1}^1 \\ \tau_2 = \frac{1}{L-1} \sum_{i=1}^{L-1} H_{i,i+1}^2 \\ \tau_3 = \frac{1}{L-2} \sum_{i=1}^{L-2} H_{i,i+2}^1 \\ \tau_4 = \frac{1}{L-2} \sum_{i=1}^{L-2} H_{i,i+2}^2 \\ \dots\dots \\ \tau_{2\lambda-1} = \frac{1}{L-\lambda} \sum_{i=1}^{L-\lambda} H_{i,i+\lambda}^1 \\ \tau_{2\lambda} = \frac{1}{L-\lambda} \sum_{i=1}^{L-\lambda} H_{i,i+\lambda}^2 \end{array} \right. \quad \lambda < L-1 \quad (59)$$

where  $H_{i,j}^1$  and  $H_{i,j}^2$  are the hydrophobicity and hydrophilicity correlation functions given by

$$\begin{cases} H_{i,j}^1 = h^1(\mathbf{R}_i) \cdot h^1(\mathbf{R}_j) \\ H_{i,j}^2 = h^2(\mathbf{R}_i) \cdot h^2(\mathbf{R}_j) \end{cases} \quad (60)$$

where  $h^1(\mathbf{R}_i)$  and  $h^2(\mathbf{R}_i)$  are, respectively, the hydrophobicity and hydrophilicity values (Table 7) for the  $i$ -th ( $i = 1, 2, \dots, L$ ) amino acid in Eq.47, and the dot ( $\cdot$ ) means the multiplication sign.

Note that before substituting the values of hydrophobicity and hydrophilicity into Eq.60, they are all subjected to a standard conversion as described by the following equation:

$$\left\{ \begin{array}{l} h^1(\mathbb{R}_i) = \frac{h_0^1(\mathbb{R}_i) - \sum_{k=1}^{20} \frac{h_0^1(\mathbb{R}_k)}{20}}{\sqrt{\frac{\sum_{u=1}^{20} \left[ h_0^1(\mathbb{R}_u) - \sum_{k=1}^{20} \frac{h_0^1(\mathbb{R}_k)}{20} \right]^2}{20}}} \\ h^2(\mathbb{R}_i) = \frac{h_0^2(\mathbb{R}_i) - \sum_{k=1}^{20} \frac{h_0^2(\mathbb{R}_k)}{20}}{\sqrt{\frac{\sum_{u=1}^{20} \left[ h_0^2(\mathbb{R}_u) - \sum_{k=1}^{20} \frac{h_0^2(\mathbb{R}_k)}{20} \right]^2}{20}}} \end{array} \right. \quad (61)$$

where we use the  $\mathbb{R}_i$  ( $i = 1, 2, \dots, 20$ ) to represent the 20 native amino acids. The symbols  $h_0^1$  and  $h_0^2$  represent the original hydrophobicity and hydrophilicity values of the amino acid in the brackets right after the symbols.

For more information of the SC-PseAAC, please refer to (17).

### 3.3.3 General parallel correlation pseudo amino acid composition (PC-PseAAC-General)

The PC-PseAAC-General approach (14) cannot only incorporate comprehensive built-in indices (**Table 5**) extracted from AAindex (15), but also allow the users to upload their own indices to generate the PC-PseAAC-General feature vector.

Given a protein sequence  $\mathbf{P}$  (**Eq.47**), the PC-PseAAC-General feature vector of  $\mathbf{P}$  is defined:

$$\mathbf{P} = [x_1 \quad x_2 \quad \cdots \quad x_{20} \quad x_{20+1} \quad \cdots \quad x_{20+\lambda}]^T \quad (62)$$

where

$$x_u = \begin{cases} \frac{f_u}{\sum_{i=1}^{20} f_i + w \sum_{j=1}^{\lambda} \theta_j} & (1 \leq u \leq 20) \\ \frac{w\theta_{u-20}}{\sum_{i=1}^{20} f_i + w \sum_{j=1}^{\lambda} \theta_j} & (20+1 \leq u \leq 20+\lambda) \end{cases} \quad (63)$$

where  $f_i$  ( $i=1,2,\dots,20$ ) is the normalized occurrence frequency of the 20 amino acids in the protein  $\mathbf{P}$ ; the parameter  $\lambda$  is an integer, representing the highest counted rank (or tier) of the correlation along a protein sequence;  $w$  is the weight factor ranging from 0 to 1;  $\theta_j$  ( $j=1,2,\dots,\lambda$ ) is called the  $j$ -tier correlation factor reflecting the sequence-order correlation between all the  $j$ -th most contiguous residues along a protein chain, which is defined:

$$\left\{ \begin{array}{l} \theta_1 = \frac{1}{L-1} \sum_{i=1}^{L-1} \Theta(\mathbf{R}_i, \mathbf{R}_{i+1}) \\ \theta_2 = \frac{1}{L-2} \sum_{i=1}^{L-2} \Theta(\mathbf{R}_i, \mathbf{R}_{i+2}) \\ \theta_3 = \frac{1}{L-3} \sum_{i=1}^{L-3} \Theta(\mathbf{R}_i, \mathbf{R}_{i+3}) \\ \dots\dots \\ \theta_\lambda = \frac{1}{L-\lambda} \sum_{i=1}^{L-\lambda} \Theta(\mathbf{R}_i, \mathbf{R}_{i+\lambda}) \end{array} \right. \quad (\lambda < L) \quad (64)$$

where the correlation function is given by

$$\Theta(\mathbf{R}_i, \mathbf{R}_j) = \frac{1}{\mu} \sum_{u=1}^{\mu} [H_u(\mathbf{R}_i) - H_u(\mathbf{R}_j)]^2 \quad (65)$$

where  $\mu$  is the number of physicochemical indices considered that listed in the **Table 5**;  $H_u(\mathbf{R}_i)$  is the  $u$ -th physicochemical index value of the amino acid  $\mathbf{R}_i$ ;  $H_u(\mathbf{R}_j)$ , the  $u$ -th physicochemical index value for the amino acid  $\mathbf{R}_j$ . Note that before substituting the physicochemical indices values into **Eq.65**, they are all subjected to a standard conversion as described by the following equation:

$$H_u(i) = \frac{H_u^0(i) - \sum_{i=1}^{20} \frac{H_u^0(i)}{20}}{\sqrt{\frac{\sum_{i=1}^{20} \left[ H_u^0(i) - \sum_{i=1}^{20} \frac{H_u^0(i)}{20} \right]^2}{20}}} \quad (66)$$

where  $H_u^0(i)$  is the  $u$ -th original physicochemical value of the  $i$ -th amino acid.

### 3.3.4 General series correlation pseudo amino acid composition (SC-PseAAC-General)

The SC-PseAAC-General approach (14) cannot only incorporate comprehensive built-in indices (**Table 5**) extracted from AAindex (15), but also allow the users to upload their own indices to generate the SC-PseAAC-General feature vector.

Given a protein sequence  $\mathbf{P}$  (**Eq.47**), the SC-PseAAC-General feature vector of  $\mathbf{P}$  is defined:

$$\mathbf{P} = [p_1 \quad p_2 \quad \dots \quad p_{20} \quad p_{20+1} \quad \dots \quad p_{20+\lambda} \quad p_{20+\lambda+1} \quad \dots \quad p_{20+\lambda\Lambda}]^T \quad (67)$$

where

$$p_u = \begin{cases} \frac{f_u}{\sum_{i=1}^{20} f_i + w \sum_{j=1}^{\lambda\Lambda} \tau_j} & (1 \leq u \leq 20) \\ \frac{w\tau_{u-20}}{\sum_{i=1}^{20} f_i + w \sum_{j=1}^{\lambda\Lambda} \tau_j} & (20+1 \leq u \leq 20+\lambda\Lambda) \end{cases} \quad (68)$$

where  $f_i$  ( $i = 1, 2, \dots, 20$ ) is the normalized occurrence frequency of the 20 native amino acids in the protein  $\mathbf{P}$ , the parameter  $\lambda$  is an integer, representing the highest

counted rank (or tier) of the correlation along a protein sequence;  $w$  is the weight factor ranging from 0 to 1;  $\Lambda$  is the number of physicochemical indices (**Table 5**);  $\tau_j$  the  $j$ -tier sequence-correlation factor reflecting the sequence-order correlation between all the most contiguous residues along a protein sequence, which is defined:

$$\left\{ \begin{array}{l} \tau_1 = \frac{1}{L-1} \sum_{i=1}^{L-1} H_{i,i+1}^1 \\ \tau_2 = \frac{1}{L-1} \sum_{i=1}^{L-1} H_{i,i+1}^2 \\ \dots\dots \\ \tau_\Lambda = \frac{1}{L-1} \sum_{i=1}^{L-1} H_{i,i+1}^\Lambda \quad \lambda < (L-1) \\ \dots\dots \\ \tau_{\lambda\Lambda-1} = \frac{1}{L-\lambda} \sum_{i=1}^{L-\lambda} H_{i,i+\lambda}^{\Lambda-1} \\ \tau_{\lambda\Lambda} = \frac{1}{L-\lambda} \sum_{i=1}^{L-\lambda} H_{i,i+\lambda}^\Lambda \end{array} \right. \quad (69)$$

where  $H_{i,i+m}^\zeta$  is the correlation function given by

$$\left\{ \begin{array}{l} H_{i,i+m}^\zeta = h^\zeta(\mathbf{R}_i) \cdot h^\zeta(\mathbf{R}_{i+m}) \\ \zeta = 1, 2, \dots, \Lambda; m = 1, 2, \dots, \lambda; i = 1, 2, \dots, L - m \end{array} \right. \quad (70)$$

where  $h^\zeta(\mathbf{R}_i)$  is the  $\zeta$ -th physicochemical value for the  $i$ -th ( $i = 1, 2, \dots, L$ ) amino acid in **Eq.47**, and the dot ( $\cdot$ ) means the multiplication sign.

Note that before substituting the physicochemical values into **Eq.70**, they are all subjected to a standard conversion as described by the following equation:

$$h^\zeta(\mathbf{R}_i) = \frac{h_0^\zeta(\mathbf{R}_i) - \sum_{k=1}^{20} \frac{h_0^\zeta(\mathbb{R}_k)}{20}}{\sqrt{\frac{\sum_{u=1}^{20} \left[ h_0^\zeta(\mathbb{R}_u) - \sum_{k=1}^{20} \frac{h_0^\zeta(\mathbb{R}_k)}{20} \right]^2}{20}}} \quad (71)$$

where we use the  $\mathbb{R}_i$  ( $i = 1, 2, \dots, 20$ ) to represent the 20 native amino acids. The symbols  $h_0^\zeta$  represent the  $\zeta$ -th original physicochemical value of the amino acid in the brackets right after the symbols.

**Table 1.** The names of the 148 physicochemical indices for dinucleotides (DNA).

The values of 148 physicochemical indices can be found [here](#).

|                              |                               |                                       |
|------------------------------|-------------------------------|---------------------------------------|
| Base stacking                | Protein induced deformability | B-DNA twist                           |
| Propeller twist              | Duplex stability:(freeenergy) | Duplex tability(disruptenergy)        |
| Protein DNA twist            | Stabilising energy of Z-DNA   | Aida_BA_transition                    |
| Breslauer_dS                 | Electron_interaction          | Hartman_trans_free_energy             |
| Lisser_BZ_transition         | Polar_interaction             | SantaLucia_dG                         |
| Sarai_flexibility            | Stability                     | Stacking_energy                       |
| Sugimoto_dS                  | Watson-Crick_interaction      | Twist                                 |
| Shift                        | Slide                         | Rise                                  |
| Twist stiffness              | Tilt stiffness                | Shift_rise                            |
| Twist_shift                  | Enthalpy1                     | Twist_twist                           |
| Shift2                       | Tilt3                         | Tilt1                                 |
| Slide (DNA-protein complex)1 | Tilt_shift                    | Twist_tilt                            |
| Roll_rise                    | Stacking energy               | Stacking energy1                      |
| Propeller Twist              | Roll11                        | Rise (DNA-protein complex)            |
| Roll2                        | Roll3                         | Roll1                                 |
| Slide_slide                  | Enthalpy                      | Shift_shift                           |
| Flexibility_slide            | Minor Groove Distance         | Rise (DNA-protein complex)1           |
| Roll (DNA-protein complex)1  | Entropy                       | Cytosine content                      |
| Major Groove Distance        | Twist (DNA-protein complex)   | Purine (AG) content                   |
| Tilt_slide                   | Major Groove Width            | Major Groove Depth                    |
| Free energy6                 | Free energy7                  | Free energy4                          |
| Free energy3                 | Free energy1                  | Twist_roll                            |
| Flexibility_shift            | Shift (DNA-protein complex)1  | Thymine content                       |
| Tip                          | Keto (GT) content             | Roll stiffness                        |
| Entropy1                     | Roll_slide                    | Slide (DNA-protein complex)           |
| Twist2                       | Twist5                        | Twist4                                |
| Tilt (DNA-protein complex)1  | Twist_slide                   | Minor Groove Depth                    |
| Persistence Length           | Rise3                         | Shift stiffness                       |
| Slide3                       | Slide2                        | Slide1                                |
| Rise1                        | Rise stiffness                | Mobility to bend towards minor groove |
| Dinucleotide GC Content      | A-philicity                   | Wedge                                 |
| DNA denaturation             | Bending stiffness             | Free energy5                          |
| Breslauer_dG                 | Breslauer_dH                  | Shift (DNA-protein complex)           |
| Helix-Coil_transition        | Ivanov_BA_transition          | Slide_rise                            |
| SantaLucia_dH                | SantaLucia_dS                 | Minor Groove Width                    |
| Sugimoto_dG                  | Sugimoto_dH                   | Twist1                                |
| Tilt                         | Roll                          | Twist7                                |
| Clash Strength               | Roll_roll                     | Roll (DNA-protein complex)            |

|                              |                      |                                        |
|------------------------------|----------------------|----------------------------------------|
| Adenine content              | Direction            | Probability contacting nucleosome core |
| Roll_shift                   | Shift_slide          | Shift1                                 |
| Tilt4                        | Tilt2                | Free energy8                           |
| Twist (DNA-protein complex)1 | Tilt_rise            | Free energy2                           |
| Stacking energy2             | Stacking energy3     | Rise_rise                              |
| Tilt_tilt                    | Roll4                | Tilt_roll                              |
| Minor Groove Size            | GC content           | Inclination                            |
| Slide stiffness              | Melting Temperature1 | Twist3                                 |
| Tilt (DNA-protein complex)   | Guanine content      | Twist6                                 |
| Major Groove Size            | Twist_rise           | Rise2                                  |
| Melting Temperature          | Free energy          | Mobility to bend towards major groove  |
| Bend                         |                      |                                        |

**Table 2.** The names of the 12 physicochemical indices for trinucleotides (DNA).

For more information of the indices listed in this table, please click [here](#), their values can be found [here](#).

|                        |                         |                          |
|------------------------|-------------------------|--------------------------|
| Bendability (DNase)    | Bendability (consensus) | Trinucleotide GC Content |
| Consensus_roll         | Consensus-Rigid         | Dnase I                  |
| MW-Daltons             | MW-kg                   | Nucleosome               |
| Nucleosome positioning | Dnase I-Rigid           | Nucleosome-Rigid         |

**Table 3.** The names of the 6 physicochemical indices for dinucleotides (DNA).

For more information of the indices listed in this table, please click [here](#), their values can be found [here](#).

|            |            |           |
|------------|------------|-----------|
| Twist(DNA) | Tilt(DNA)  | Roll(DNA) |
| Shift(DNA) | Slide(DNA) | Rise(DNA) |

**Table 4.** The names of the 22 physicochemical indices for dinucleotides (RNA).

For more information of the indices listed in this table, please click [here](#), their values can be found [here](#).

|                      |                       |
|----------------------|-----------------------|
| Shift (RNA)          | Hydrophilicity (RNA)  |
| Hydrophilicity (RNA) | GC content            |
| Purine (AG) content  | Keto (GT) content     |
| Adenine content      | Guanine content       |
| Cytosine content     | Thymine content       |
| Slide (RNA)          | Rise (RNA)            |
| Tilt (RNA)           | Roll (RNA)            |
| Twist (RNA)          | Stacking energy (RNA) |
| Enthalpy (RNA)       | Entropy (RNA)         |
| Free energy (RNA)    | Free energy (RNA)     |
| Enthalpy (RNA)       | Entropy (RNA)         |

**Table 5.** The names of the 547 physicochemical indices for amino acids.

The meanings of the physicochemical indices can be found [here](#), and their values can be found [here](#).

| Hydrophobicity | Hydrophilicity | Mass       |
|----------------|----------------|------------|
| ARGP820102     | ARGP820103     | BEGF750101 |
| BHAR880101     | BIGC670101     | BIOV880101 |
| BROC820102     | BULH740101     | BULH740102 |
| BUNA790103     | BURA740101     | BURA740102 |
| CHAM820102     | CHAM830101     | CHAM830102 |
| CHAM830105     | CHAM830106     | CHAM830107 |
| CHOC760101     | CHOC760102     | CHOC760103 |
| CHOP780201     | CHOP780202     | CHOP780203 |
| CHOP780206     | CHOP780207     | CHOP780208 |
| CHOP780211     | CHOP780212     | CHOP780213 |
| CHOP780216     | CIDH920101     | CIDH920102 |
| CIDH920105     | COHE430101     | CRAJ730101 |
| DAWD720101     | DAYM780101     | DAYM780201 |
| EISD840101     | EISD860101     | EISD860102 |
| FASG760102     | FASG760103     | FASG760104 |
| FAUJ880101     | FAUJ880102     | FAUJ880103 |
| FAUJ880106     | FAUJ880107     | FAUJ880108 |
| FAUJ880111     | FAUJ880112     | FAUJ880113 |
| FINA910102     | FINA910103     | FINA910104 |
| GEIM800102     | GEIM800103     | GEIM800104 |
| GEIM800107     | GEIM800108     | GEIM800109 |
| GOLD730101     | GOLD730102     | GRAR740101 |
| GUYH850101     | HOPA770101     | HOPT810101 |
| HUTJ700103     | ISOY800101     | ISOY800102 |
| ISOY800105     | ISOY800106     | ISOY800107 |
| JANJ780102     | JANJ780103     | JANJ790101 |
| JOND750102     | JOND920101     | JOND920102 |
| KANM800101     | KANM800102     | KANM800103 |
| KARP850102     | KARP850103     | KHAG800101 |
| KRIW790101     | KRIW790102     | KRIW790103 |
| LEVM760101     | LEVM760102     | LEVM760103 |
| LEVM760106     | LEVM760107     | LEVM780101 |
| LEVM780104     | LEVM780105     | LEVM780106 |
| LIFS790102     | LIFS790103     | MANP780101 |
| MAXF760103     | MAXF760104     | MAXF760105 |
| MEEJ800101     | MEEJ800102     | MEEJ810101 |
| MEIH800102     | MEIH800103     | MIYS850101 |
| NAGK730103     | NAKH900101     | NAKH900102 |
| NAKH900105     | NAKH900106     | NAKH900107 |
| NAKH900110     | NAKH900111     | NAKH900112 |
| NAKH920102     | NAKH920103     | NAKH920104 |
| NAKH920107     | NAKH920108     | NISK800101 |
| OOBM770101     | OOBM770102     | OOBM770103 |



|            |            |            |
|------------|------------|------------|
| OOBM850101 | OOBM850102 | OOBM850103 |
| PALJ810101 | PALJ810102 | PALJ810103 |
| PALJ810106 | PALJ810107 | PALJ810108 |
| PALJ810111 | PALJ810112 | PALJ810113 |
| PALJ810116 | PARJ860101 | PLIV810101 |
| PONP800103 | PONP800104 | PONP800105 |
| PONP800108 | PRAM820101 | PRAM820102 |
| PRAM900102 | PRAM900103 | PRAM900104 |
| QIAN880101 | QIAN880102 | QIAN880103 |
| QIAN880106 | QIAN880107 | QIAN880108 |
| QIAN880111 | QIAN880112 | QIAN880113 |
| QIAN880116 | QIAN880117 | QIAN880118 |
| QIAN880121 | QIAN880122 | QIAN880123 |
| QIAN880126 | QIAN880127 | QIAN880128 |
| QIAN880131 | QIAN880132 | QIAN880133 |
| QIAN880136 | QIAN880137 | QIAN880138 |
| RACS770102 | RACS770103 | RACS820101 |
| RACS820104 | RACS820105 | RACS820106 |
| RACS820109 | RACS820110 | RACS820111 |
| RACS820114 | RADA880101 | RADA880102 |
| RADA880105 | RADA880106 | RADA880107 |
| RICJ880102 | RICJ880103 | RICJ880104 |
| RICJ880107 | RICJ880108 | RICJ880109 |
| RICJ880112 | RICJ880113 | RICJ880114 |
| RICJ880117 | ROBB760101 | ROBB760102 |
| ROBB760105 | ROBB760106 | ROBB760107 |
| ROBB760110 | ROBB760111 | ROBB760112 |
| ROSG850101 | ROSG850102 | ROSM880101 |
| SIMZ760101 | SNEP660101 | SNEP660102 |
| SUEM840101 | SUEM840102 | SWER830101 |
| TANS770103 | TANS770104 | TANS770105 |
| TANS770108 | TANS770109 | TANS770110 |
| VASM830103 | VELV850101 | VENT840101 |
| WEBA780101 | WERD780101 | WERD780102 |
| WOEC730101 | WOLR810101 | WOLS870101 |
| YUTK870101 | YUTK870102 | YUTK870103 |
| ZIMJ680101 | ZIMJ680102 | ZIMJ680103 |
| AURR980101 | AURR980102 | AURR980103 |
| AURR980106 | AURR980107 | AURR980108 |
| AURR980111 | AURR980112 | AURR980113 |
| AURR980116 | AURR980117 | AURR980118 |
| ONEK900101 | ONEK900102 | VINM940101 |
| VINM940104 | MUNV940101 | MUNV940102 |
| MUNV940105 | WIMW960101 | KIMC930101 |
| PARS000101 | PARS000102 | KUMS000101 |
| KUMS000104 | TAKK010101 | FODM020101 |
| NADH010103 | NADH010104 | NADH010105 |
| MONM990201 | KOEP990101 | KOEP990102 |
| CEDJ970103 | CEDJ970104 | CEDJ970105 |

|            |            |            |
|------------|------------|------------|
| FUKS010103 | FUKS010104 | FUKS010105 |
| FUKS010108 | FUKS010109 | FUKS010110 |
| AVBF000101 | AVBF000102 | AVBF000103 |
| AVBF000106 | AVBF000107 | AVBF000108 |
| MIT020101  | TSAJ990101 | TSAJ990102 |
| WILM950101 | WILM950102 | WILM950103 |
| GUOD860101 | JURD980101 | BASU050101 |
| SUYM030101 | PUNT030101 | PUNT030102 |
| GEOR030103 | GEOR030104 | GEOR030105 |
| GEOR030108 | GEOR030109 | ZHOH040101 |
| BAEK050101 | HARY940101 | PONJ960101 |
| OLSK800101 | KIDA850101 | GUYH850102 |
| GUYH850105 | ROSM880104 | ROSM880105 |
| BLAS910101 | CASG920101 | CORJ870101 |
| CORJ870104 | CORJ870105 | CORJ870106 |
| MIYS990101 | MIYS990102 | MIYS990103 |
| ENGD860101 | FASG890101 | TANS770101 |
| ANDN920101 | ARGP820101 | TANS770106 |
| BEGF750102 | BEGF750103 | VASM830101 |
| BIOV880102 | BROC820101 | VHEG790101 |
| BUNA790101 | BUNA790102 | WERD780103 |
| CHAM810101 | CHAM820101 | WOLS870102 |
| CHAM830103 | CHAM830104 | YUTK870104 |
| CHAM830108 | CHOC750101 | ZIMJ680104 |
| CHOC760104 | CHOP780101 | AURR980104 |
| CHOP780204 | CHOP780205 | AURR980109 |
| CHOP780209 | CHOP780210 | AURR980114 |
| CHOP780214 | CHOP780215 | AURR980119 |
| CIDH920103 | CIDH920104 | VINM940102 |
| CRAJ730102 | CRAJ730103 | MUNV940103 |
| DESM900101 | DESM900102 | MONM990101 |
| EISD860103 | FASG760101 | KUMS000102 |
| FASG760105 | FAUJ830101 | NADH010101 |
| FAUJ880104 | FAUJ880105 | NADH010106 |
| FAUJ880109 | FAUJ880110 | CEDJ970101 |
| FINA770101 | FINA910101 | FUKS010101 |
| GARJ730101 | GEIM800101 | FUKS010106 |
| GEIM800105 | GEIM800106 | FUKS010111 |
| GEIM800110 | GEIM800111 | AVBF000104 |
| GRAR740102 | GRAR740103 | AVBF000109 |
| HUTJ700101 | HUTJ700102 | COSI940101 |
| ISOY800103 | ISOY800104 | WILM950104 |
| ISOY800108 | JANJ780101 | BASU050102 |
| JANJ790102 | JOND750101 | GEOR030101 |
| JUKT750101 | JUNJ780101 | GEOR030106 |
| KANM800104 | KARP850101 | ZHOH040102 |
| KLEP840101 | KRIW710101 | DIGM050101 |
| KYTJ820101 | LAWE840101 | GUYH850103 |
| LEVM760104 | LEVM760105 | JACR890101 |

|            |            |            |
|------------|------------|------------|
| LEVM780102 | LEVM780103 | CORJ870102 |
| LEWP710101 | LIFS790101 | CORJ870107 |
| MAXF760101 | MAXF760102 | MIYS990104 |
| MAXF760106 | MCMT640101 | TANS770102 |
| MEEJ810102 | MEIH800101 | TANS770107 |
| NAGK730101 | NAGK730102 | VASM830102 |
| NAKH900103 | NAKH900104 | WARP780101 |
| NAKH900108 | NAKH900109 | WERD780104 |
| NAKH900113 | NAKH920101 | WOLS870103 |
| NAKH920105 | NAKH920106 | ZASB820101 |
| NISK860101 | NOZY710101 | ZIMJ680105 |
| OOBM770104 | OOBM770105 | AURR980105 |
| OOBM850104 | OOBM850105 | AURR980110 |
| PALJ810104 | PALJ810105 | AURR980115 |
| PALJ810109 | PALJ810110 | AURR980120 |
| PALJ810114 | PALJ810115 | VINM940103 |
| PONP800101 | PONP800102 | MUNV940104 |
| PONP800106 | PONP800107 | BLAM930101 |
| PRAM820103 | PRAM900101 | KUMS000103 |
| PTIO830101 | PTIO830102 | NADH010102 |
| QIAN880104 | QIAN880105 | NADH010107 |
| QIAN880109 | QIAN880110 | CEDJ970102 |
| QIAN880114 | QIAN880115 | FUKS010102 |
| QIAN880119 | QIAN880120 | FUKS010107 |
| QIAN880124 | QIAN880125 | FUKS010112 |
| QIAN880129 | QIAN880130 | AVBF000105 |
| QIAN880134 | QIAN880135 | YANJ020101 |
| QIAN880139 | RACS770101 | PONP930101 |
| RACS820102 | RACS820103 | KUHL950101 |
| RACS820107 | RACS820108 | BASU050103 |
| RACS820112 | RACS820113 | GEOR030102 |
| RADA880103 | RADA880104 | GEOR030107 |
| RADA880108 | RICJ880101 | ZHOH040103 |
| RICJ880105 | RICJ880106 | WOLR790101 |
| RICJ880110 | RICJ880111 | GUYH850104 |
| RICJ880115 | RICJ880116 | COWR900101 |
| ROBB760103 | ROBB760104 | CORJ870103 |
| ROBB760108 | ROBB760109 | CORJ870108 |
| ROBB760113 | ROBB790101 | MIYS990105 |
| ROSM880102 | ROSM880103 | SNEP660104 |
| SNEP660103 |            |            |

**Table 6.** The names of the 3 physicochemical indices for amino acids.

The values of 3 physicochemical indices can be found [here](#).

|                |                |      |
|----------------|----------------|------|
| Hydrophobicity | hydrophilicity | mass |
|----------------|----------------|------|

**Table 7.** The names of the 2 physicochemical indices for amino acids.

The values of 2 physicochemical indices can be found [here](#).

| hydrophobicity | hydrophilicity |
|----------------|----------------|
|----------------|----------------|

## References

1. Lee, D., Karchin, R. and Beer, M.A. (2011) Discriminative prediction of mammalian enhancers from DNA sequence. *Genome Research*, **21**, 2167-2180.
2. Noble, W.S., Kuehn, S., Thurman, R., Yu, M. and Stamatoyannopoulos, J. (2005) Predicting the in vivo signature of human gene regulatory sequences. *Bioinformatics*, **21 Suppl 1**, i338-343.
3. Gupta, S., Dennis, J., Thurman, R.E., Kingston, R., Stamatoyannopoulos, J.A. and Noble, W.S. (2008) Predicting human nucleosome occupancy from primary sequence. *PLoS Computational Biology*, **4**, e1000134.
4. Dong, Q., Zhou, S. and Guan, J. (2009) A new taxonomy-based protein fold recognition approach based on autocross-covariance transformation. *Bioinformatics*, **25**, 2655-2662.
5. Guo, Y., Yu, L., Wen, Z. and Li, M. (2008) Using support vector machine combined with auto covariance to predict protein-protein interactions from protein sequences. *Nucleic Acids Res*, **36**, 3025-3030.
6. Chen, W., Zhang, X., Brooker, J., Lin, H., Zhang, L. and Chou, K.-C. (2014) PseKNC-General: a cross-platform package for generating various modes of pseudo nucleotide compositions. *Bioinformatics*, DOI: 10.1093/bioinformatics/btu1602.
7. Friedel, M., Nikolajewa, S., Suhnel, J. and Wilhelm, T. (2008) DiProDB: a database for dinucleotide properties. *Nucleic Acids Res*, **37**, D37-D40.
8. Chen, W., Feng, P.M., Lin, H. and Chou, K.C. (2013) iRSpot-PseDNC: identify recombination spots with pseudo dinucleotide composition. *Nucleic Acids Res*, **41**, e68.
9. Guo, S.H., Deng, E.Z., Xu, L.Q., Ding, H., Lin, H., Chen, W. and Chou, K.C. (2014) iNuc-PseKNC: a sequence-based predictor for predicting nucleosome positioning in genomes with pseudo k-tuple nucleotide composition. *Bioinformatics*, **30**, 1522-1529.
10. Lin, H., Deng, E.-Z., Ding, H., Chen, W. and Chou, K.-C. (2014) iPro54-PseKNC: a sequence-based predictor for identifying sigma-54 promoters in prokaryote with pseudo k-tuple nucleotide composition. *Nucleic Acids Res*, **42**, 12961-12972.
11. Chen, W., Lei, T.Y., Jin, D.C., Lin, H. and Chou, K.C. (2014) PseKNC: a flexible web server for generating pseudo K-tuple nucleotide composition. *Analytical biochemistry*, **456**, 53-60.
12. Wei, L., Liao, M., Gao, Y., Ji, R., He, Z. and Zou, Q. (2014) Improved and Promising Identification of Human MicroRNAs by Incorporating a High-quality Negative Set. *IEEE/ACM Transactions on Computational Biology and Bioinformatics*, **11**, 192-201.
13. Liu, B., Wang, X., Lin, L., Dong, Q. and Wang, X. (2008) A Discriminative Method for Protein Remote Homology Detection and Fold Recognition Combining Top-n-grams and Latent Semantic Analysis. *BMC Bioinformatics*, **9**, 510.
14. Cao, D.-S., Xu, Q.-S. and Liang, Y.-Z. (2013) propy: a tool to generate various modes of Chou's PseAAC. *Bioinformatics*, **29**, 960-962.
15. Kawashima, S., Pokarowski, P., Pokarowska, M., Kolinski, A., Katayama, T. and Kanehisa, M. (2008) AAindex: amino acid index database, progress report 2008. *Nucleic Acids Res*, **36**, D202-D205.
16. Chou, K.-C. (2001) Prediction of protein cellular attributes using pseudo-amino-acid-composition. *PROTEINS: Structure, Function, and Genetics*, **43**, 246-255.
17. Chou, K.-C. (2005) Using amphiphilic pseudo amino acid composition to predict enzyme subfamily classes. *Bioinformatics*, **21**, 10-19.
